# Supplementary material for: First-principles study on the effects of N and Al doping on the mechanical properties and electronic structures of TiC
Source: Royal Society of Chemistry journal article supplement (doi:10.1039/d0ra06630c), 2020-01-01
Supplement: d0ra06630c1.pdf [file d0ra06630c1.pdf]

TiC

1.0

|              |              |              |
|--------------|--------------|--------------|
| 4.3312997818 | 0.0000000000 | 0.0000000000 |
| 0.0000000000 | 4.3312997818 | 0.0000000000 |
| 0.0000000000 | 0.0000000000 | 4.3312997818 |

C Ti

4 4

Cartesian

|              |              |              |
|--------------|--------------|--------------|
| 0.0000000000 | 0.0000000000 | 0.0000000000 |
| 0.0000000000 | 2.165649891  | 2.165649891  |
| 2.165649891  | 0.0000000000 | 2.165649891  |
| 2.165649891  | 2.165649891  | 0.0000000000 |
| 2.165649891  | 2.165649891  | 2.165649891  |
| 2.165649891  | 0.0000000000 | 0.0000000000 |
| 0.0000000000 | 2.165649891  | 0.0000000000 |
| 0.0000000000 | 0.0000000000 | 2.165649891  |

TiN

1.0

|              |              |              |
|--------------|--------------|--------------|
| 4.2463002205 | 0.0000000000 | 0.0000000000 |
| 0.0000000000 | 4.2463002205 | 0.0000000000 |
| 0.0000000000 | 0.0000000000 | 4.2463002205 |

N Ti

4 4

Cartesian

|              |              |              |
|--------------|--------------|--------------|
| 0.0000000000 | 0.0000000000 | 0.0000000000 |
| 0.0000000000 | 2.123150110  | 2.123150110  |
| 2.123150110  | 0.0000000000 | 2.123150110  |
| 2.123150110  | 2.123150110  | 0.0000000000 |
| 2.123150110  | 2.123150110  | 2.123150110  |
| 2.123150110  | 0.0000000000 | 0.0000000000 |
| 0.0000000000 | 2.123150110  | 0.0000000000 |
| 0.0000000000 | 0.0000000000 | 2.123150110  |

TiC0.75N0.25

1.0

|              |              |              |
|--------------|--------------|--------------|
| 4.3074998856 | 0.0000000000 | 0.0000000000 |
| 0.0000000000 | 4.3074998856 | 0.0000000000 |
| 0.0000000000 | 0.0000000000 | 4.3074998856 |

| N | C | Ti |
|---|---|----|
| 1 | 3 | 4  |

Cartesian

|              |              |              |
|--------------|--------------|--------------|
| 0.0000000000 | 0.0000000000 | 0.0000000000 |
| 0.0000000000 | 2.153749943  | 2.153749943  |
| 2.153749943  | 0.0000000000 | 2.153749943  |
| 2.153749943  | 2.153749943  | 0.0000000000 |
| 2.153749943  | 2.153749943  | 2.153749943  |
| 2.153749943  | 0.0000000000 | 0.0000000000 |
| 0.0000000000 | 2.153749943  | 0.0000000000 |
| 0.0000000000 | 0.0000000000 | 2.153749943  |

Ti<sub>0.75</sub>Al<sub>0.25</sub>C

1.0

|              |              |              |
|--------------|--------------|--------------|
| 4.3220000267 | 0.0000000000 | 0.0000000000 |
| 0.0000000000 | 4.3220000267 | 0.0000000000 |
| 0.0000000000 | 0.0000000000 | 4.3220000267 |

| C | Al | Ti |
|---|----|----|
| 4 | 1  | 3  |

Cartesian

|              |              |              |
|--------------|--------------|--------------|
| 0.0000000000 | 0.0000000000 | 0.0000000000 |
| 0.0000000000 | 2.161000013  | 2.161000013  |
| 2.161000013  | 0.0000000000 | 2.161000013  |
| 2.161000013  | 2.161000013  | 0.0000000000 |
| 2.161000013  | 2.161000013  | 2.161000013  |
| 2.161000013  | 0.0000000000 | 0.0000000000 |
| 0.0000000000 | 2.161000013  | 0.0000000000 |
| 0.0000000000 | 0.0000000000 | 2.161000013  |

Ti0.75Al0.25C0.75N0.25

1.0

|              |              |              |
|--------------|--------------|--------------|
| 4.2916998863 | 0.0000000000 | 0.0000000000 |
| 0.0000000000 | 4.2916998863 | 0.0000000000 |
| 0.0000000000 | 0.0000000000 | 4.2916998863 |

| N | C | Al | Ti |
|---|---|----|----|
| 1 | 3 | 1  | 3  |

Cartesian

|              |              |              |
|--------------|--------------|--------------|
| 0.0000000000 | 0.0000000000 | 0.0000000000 |
| 0.0000000000 | 2.145849943  | 2.145849943  |
| 2.145849943  | 0.0000000000 | 2.145849943  |
| 2.145849943  | 2.145849943  | 0.0000000000 |
| 2.145849943  | 2.145849943  | 2.145849943  |
| 2.145849943  | 0.0000000000 | 0.0000000000 |
| 0.0000000000 | 2.145849943  | 0.0000000000 |
| 0.0000000000 | 0.0000000000 | 2.145849943  |
